# Supplementary material for: Whole-Genome Sequencing of Tibetan Macaque (Macaca thibetana) Provides New Insight into the Macaque Evolutionary History
Source: PubMed Central journal article supplement — Mol Biol Evol. 2014 Mar 18;31(6):1475–89. doi: 10.1093/molbev/msu104 (PMC4032132; doi:10.1093/molbev/msu104), 2014-03-18
Supplement: supp_msu104_Supplementary_File_1_TableS1toS8_S10toS14.pdf [file supp_msu104_Supplementary_File_1_TableS1toS8_S10toS14.pdf]

**Table S1 Sequence data, alignment statistics, rate of PCR duplicates and mean genome wide coverage of each individual.**

| Sample <sup>a</sup> | Total reads   | Alignment rate            |                           |                         | % PCR duplicates | Mean coverage |
|---------------------|---------------|---------------------------|---------------------------|-------------------------|------------------|---------------|
|                     |               | Overall                   | Unique concordantly       | Multiple concordantly   |                  |               |
| CR1                 | 3,299,851,568 | 2,272,823,480<br>(68.88%) | 1,612,101,578<br>(48.85%) | 658,111,042<br>(19.94%) | 6.18%            | 45.65 X       |
| CR2                 | 706,459,956   | 667,000,650<br>(94.42%)   | 475,784,910<br>(67.35%)   | 190,862,322<br>(27.02%) | 9.54%            | 10.52 X       |
| CE1                 | 3,692,987,634 | 2,233,225,340<br>(60.47%) | 1,542,953,834<br>(41.78%) | 687,719,528<br>(18.62%) | 9.11%            | 43.96 X       |
| CE2 <sup>b</sup>    | 4,890,495,549 |                           | NA                        |                         | 33.33%           | 24.69 X       |
| TM                  | 1,275,012,390 | 1,209,788,008<br>(94.88%) | 928,246,222<br>(72.8%)    | 280,762,936<br>(22.02%) | 8.68%            | 36.92 X       |

<sup>a</sup> CR1: Chinese rhesus macaque (Yunnan Province), CR2: Chinese rhesus macaque (Sichuan Province), CE1: Vietnamese cynomolgus macaque, CE2: Malaysian cynomolgus macaque, TM: Tibetan macaque

<sup>b</sup> The alignment statistics can be found in reference 1

<sup>c</sup> Reference 1: Higashino A, Sakate R, Kameoka Y, Takahashi I, Hirata M, Tanuma R, Masui T, Yasutomi Y, Osada N: Whole-genome sequencing and analysis of the Malaysian cynomolgus macaque (*Macaca fascicularis*) genome. *Genome Biology* 2012, 13:R58

**Table S2 Transitions:transversions ratio for autosomes of five macaques.**

| Sample <sup>a</sup> | Ti:Tv |
|---------------------|-------|
| CR1                 | 2.20  |
| CR2                 | 2.11  |
| CE1                 | 2.18  |
| CE2                 | 2.20  |
| TM                  | 2.17  |

<sup>a</sup> CR1: Chinese rhesus macaque (Yunnan Province), CR2: Chinese rhesus macaque (Sichuan Province), CE1: Vietnamese cynomolgus macaque, CE2: Malaysian cynomolgus macaque, TM: Tibetan macaque

**Table S3 Total numbers of synonymous and non-synonymous variants in Tibetan macaque and six different GO terms.** Numbers in parentheses are Tibetan macaque specific variants. Numbers of genes, which carried at least one homozygous non-synonymous variant, were listed too.

|                                    | Synonymous         |                         | Non-synonymous     |                         | Numbers of genes <sup>#</sup> |
|------------------------------------|--------------------|-------------------------|--------------------|-------------------------|-------------------------------|
|                                    | Total <sup>*</sup> | Homozygous <sup>*</sup> | Total <sup>*</sup> | Homozygous <sup>*</sup> |                               |
| Total variants                     | 52,987<br>(22,540) | 44,878<br>(17,259)      | 33,612<br>(13,756) | 27,348<br>(10,106)      | —                             |
| Immune response                    | 2,259              | 1,940                   | 1,224              | 1,034<br>(397)          | 347<br><b>(203)</b>           |
| Response to drug                   | 649                | 545                     | 270                | 235<br>(97)             | 78<br><b>(48)</b>             |
| Glucose metabolic process          | 443                | 344                     | 136                | 107<br>(29)             | 41<br><b>(17)</b>             |
| Insulin secretion                  | 324                | 269                     | 106                | 93<br>(40)              | 37<br><b>(21)</b>             |
| Insulin receptor binding           | 59                 | 52                      | 9                  | 9<br>(2)                | 5<br><b>(2)</b>               |
| Insulin receptor signaling pathway | 431                | 360                     | 126                | 112<br>(48)             | 35<br><b>(21)</b>             |

# Numbers of genes that carry at least one Tibetan macaque specific homozygous non-synonymous variant are showed in bold.

\* These numbers contain overlap hits. There are genes contain more than one transcript but we could not choose the single transcript annotation under DNA level, thus for some genomic position, we may report more than one time if there are more than one transcript cover that genomic position and these transcripts belong to same gene.

**Table S4 Numbers of sites pass different filters.** Percentage of the genome measured with respect to 2504762378 non-'N' bases in the autosomes of reference genome. Details of the filters can be found in Supplementary file 4.

| Sample <sup>a</sup> | SNVs       |            | Total useable sites    |                        |
|---------------------|------------|------------|------------------------|------------------------|
|                     | GF1 and SF | GF2 and SF | GF1 and SF             | GF2 and SF             |
| CR1                 | 6,701,970  | 9,384,359  | 2,211,253,060 (88.28%) | 2,264,143,011 (90.39%) |
| CR2                 | 4,842,684  | 6,252,098  | 1,597,009,392 (63.76%) | 1,637,370,536 (65.37%) |
| CE1                 | 8,545,709  | 11,751,302 | 2,194,010,374 (87.59%) | 2,245,482,535 (89.65%) |
| CE2                 | 8,709,735  | 12,000,848 | 2,210,444,562 (88.25%) | 2,261,105,771 (90.27%) |
| TM                  | 8,720,234  | 11,937,445 | 2,229,598,137 (89.01%) | 2,281,638,762 (91.09%) |

<sup>a</sup> CR1: Chinese rhesus macaque (Yunnan Province), CR2: Chinese rhesus macaque (Sichuan Province), CE1: Vietnamese cynomolgus macaque, CE2: Malaysian cynomolgus macaque, TM: Tibetan macaque

**Table S5 Single nucleotide divergence among macaques in 50 kb non-overlapping windows across the 20 autosomes.** The heterozygous variants were excluded here. The divergence values were the mean values across the 20 autosomes.

| Comparison <sup>a</sup> | Divergence |
|-------------------------|------------|
| IR/CR1                  | 0.00115    |
| IR/CR2                  | 0.00105    |
| IR/CE1                  | 0.00179    |
| IR/CE2                  | 0.00191    |
| CR1/CR2                 | 0.00042    |
| CE1/CE2                 | 0.00086    |
| CR1/CE1                 | 0.00108    |
| CR1/CE2                 | 0.00121    |
| CR2/CE1                 | 0.00109    |
| CR2/CE2                 | 0.00122    |
| TM/IR                   | 0.00384    |
| TM/CR1                  | 0.00300    |
| TM/CR2                  | 0.00301    |
| TM/CE1                  | 0.00289    |
| TM/CE2                  | 0.00280    |

<sup>a</sup> IR: the reference genome, Indian rhesus macaque, CR1: Chinese rhesus macaque (Yunnan Province), CR2: Chinese rhesus macaque (Sichuan Province), CE1: Vietnamese cynomolgus macaque, CE2: Malaysian cynomolgus macaque, TM: Tibetan macaque

**Table S6 Total sizes of possible putative introgression regions (PIRs) in Tibetan macaque genome with different window sizes under different control sets.** The numbers are without statistical criteria.

| Comparisons <sup>a</sup> | Total sizes of possible PIRs at different window sizes (kb) |         |         |         |         |         |         |         |        |        |        |        |
|--------------------------|-------------------------------------------------------------|---------|---------|---------|---------|---------|---------|---------|--------|--------|--------|--------|
|                          | 10kb                                                        | 20kb    | 30kb    | 40kb    | 50kb    | 60kb    | 80kb    | 100kb   | 200kb  | 400kb  | 600kb  | 1000kb |
| TM/CR1 - CR1/CR2         | 87,700                                                      | 41,460  | 23,670  | 16,240  | 11,900  | 9,720   | 7,760   | 6,600   | 4,400  | 4,800  | 3,600  | 2,000  |
| TM/CR1 - CR1/CE1         | 409,370                                                     | 290,080 | 218,100 | 171,000 | 141,200 | 119,160 | 82,720  | 63,300  | 24,200 | 13,600 | 11,400 | 7,000  |
| TM/CR1 - CR1/CE2         | 557,890                                                     | 431,660 | 354,180 | 299,480 | 258,600 | 224,580 | 172,880 | 143,000 | 64,600 | 28,000 | 22,800 | 16,000 |
| TM/CR2 - CR1/CR2         | 76,110                                                      | 33,220  | 18,870  | 12,200  | 8,000   | 6,660   | 5,040   | 4,700   | 2,800  | 3,200  | 3,000  | 4,000  |
| TM/CR2 - CR2/CE1         | 403,710                                                     | 283,820 | 215,490 | 168,160 | 136,550 | 113,520 | 78,720  | 60,300  | 21,800 | 14,000 | 12,600 | 8,000  |
| TM/CR2 - CR2/CE2         | 546,640                                                     | 418,360 | 336,060 | 278,840 | 239,300 | 203,940 | 155,600 | 125,100 | 54,200 | 22,400 | 15,600 | 13,000 |

<sup>a</sup> CR1: Chinese rhesus macaque (Yunnan Province), CR2: Chinese rhesus macaque (Sichuan Province), CE1: Vietnamese cynomolgus macaque, CE2: Malaysian cynomolgus macaque, TM: Tibetan macaque

**Table S7 Total sizes of possible putative introgression regions (PIRs) in Tibetan macaque genome with different window sizes under different control sets.** The possible PIRs here are all detected in both Chinese rhesus macaques. The numbers are without statistical criteria.

| Comparisons <sup>a</sup> | Total sizes of possible PIRs at different window sizes (kb) |         |         |         |         |         |         |        |        |        |        |        |
|--------------------------|-------------------------------------------------------------|---------|---------|---------|---------|---------|---------|--------|--------|--------|--------|--------|
|                          | 10kb                                                        | 20kb    | 30kb    | 40kb    | 50kb    | 60kb    | 80kb    | 100kb  | 200kb  | 400kb  | 600kb  | 1000kb |
| TM/CRs - CR1/CR2         | 32,750                                                      | 13,220  | 6,780   | 4,480   | 2,950   | 2,400   | 1,760   | 1,800  | 1,600  | 2,000  | 1,800  | 1,000  |
| TM/CRs - CRs/CE1         | 303,970                                                     | 206,040 | 150,330 | 115,680 | 93,250  | 76,200  | 52,160  | 39,800 | 15,800 | 10,400 | 9,000  | 5,000  |
| TM/CRs - CRs/CE2         | 437,000                                                     | 321,860 | 253,020 | 206,880 | 176,050 | 148,320 | 109,600 | 88,900 | 39,600 | 19,200 | 14,400 | 12,000 |

<sup>a</sup> CR1: Chinese rhesus macaque (Yunnan Province), CR2: Chinese rhesus macaque (Sichuan Province), CE1: Vietnamese cynomolgus macaque, CE2: Malaysian cynomolgus macaque, TM: Tibetan macaque

**Table S8 Numbers of specific SNVs in macaques.** Numbers of specific SNVs for different groups mean all the samples in that groups have that SNV whereas other samples do not.

| Samples/Groups <sup>a</sup> | Total     | Heterozygous | Homozygous |
|-----------------------------|-----------|--------------|------------|
| CR1                         | 2,038,702 | 1,866,243    | 172,459    |
| CR2                         | 2,005,637 | 1,835,136    | 170,501    |
| CE1                         | 2,876,161 | 2,450,466    | 425,695    |
| CE2                         | 3,452,073 | 3,009,976    | 442,097    |
| TM                          | 3,936,546 | 1,075,356    | 2,861,190  |
| CR1 + CR2                   | 468,065   | 413,082      | 54,983     |
| CE1 + CE2                   | 521,403   | 387,696      | 133,707    |

<sup>a</sup> CR1: Chinese rhesus macaque (Yunnan Province), CR2: Chinese rhesus macaque (Sichuan Province), CE1: Vietnamese cynomolgus macaque, CE2: Malaysian cynomolgus macaque, TM: Tibetan macaque



**Table S10 gProfiler functional enrichment analysis for genes carried at least one Tibetan macaque specific homozygous non-synonymous variant, which were probably, or possibly damaging from the estimation of PolyPhen-2.**

| Term name                                     | Category   | P-value | Total genes in category | Total genes in input <sup>#</sup> | Input genes in category |
|-----------------------------------------------|------------|---------|-------------------------|-----------------------------------|-------------------------|
| Sensory perception                            | GO:0007600 | 0.00151 | 598                     | 892                               | 52                      |
| Sensory perception of chemical stimulus       | GO:0007606 | 0.05000 | 391                     | 892                               | 35                      |
| Diabetes mellitus                             | HP:0000819 | 0.03140 | 168                     | 881                               | 14                      |
| Type II diabetes mellitus                     | HP:0005978 | 0.01700 | 82                      | 881                               | 9                       |
| Ectopic calcification                         | HP:0010766 | 0.00778 | 113                     | 881                               | 12                      |
| Cerebral calcification                        | HP:0002514 | 0.01800 | 56                      | 881                               | 7                       |
| Scarring                                      | HP:0100699 | 0.02370 | 101                     | 881                               | 10                      |
| Atypical scarring of skin                     | HP:0000987 | 0.01950 | 98                      | 881                               | 10                      |
| Abnormality of the face                       | HP:0000271 | 0.02450 | 1096                    | 881                               | 64                      |
| Abnormal cortical gyration                    | HP:0002536 | 0.02780 | 61                      | 881                               | 7                       |
| Thickened skin                                | HP:0001072 | 0.01130 | 210                     | 881                               | 18                      |
| Epidermal thickening                          | HP:0011368 | 0.00959 | 191                     | 881                               | 17                      |
| Abnormality of the conjunctiva                | HP:0000502 | 0.04000 | 52                      | 881                               | 6                       |
| Inflammatory abnormality of the eye           | HP:0100533 | 0.04240 | 81                      | 881                               | 8                       |
| Glaucoma                                      | HP:0000501 | 0.03000 | 167                     | 881                               | 14                      |
| Cleft upper lip                               | HP:0000204 | 0.03160 | 91                      | 881                               | 9                       |
| Non-midline cleft lip                         | HP:0100335 | 0.04430 | 40                      | 881                               | 5                       |
| Wide nasal bridge                             | HP:0000431 | 0.02730 | 181                     | 881                               | 15                      |
| Abnormality of the morphology of the rib cage | HP:0001547 | 0.03040 | 76                      | 881                               | 8                       |
| Abnormality of circulating hormone level      | HP:0003117 | 0.01170 | 119                     | 881                               | 12                      |
| Hyperinsulinemia                              | HP:0000842 | 0.01060 | 76                      | 881                               | 9                       |
| Abnormality of the choroid                    | HP:0000610 | 0.01100 | 90                      | 881                               | 10                      |
| Chorioretinal abnormality                     | HP:0000532 | 0.03730 | 79                      | 881                               | 8                       |
| Lymphadenopathy                               | HP:0002716 | 0.04670 | 68                      | 881                               | 7                       |
| Aplasia/Hypoplasia affecting the eye          | HP:0008056 | 0.03140 | 168                     | 881                               | 14                      |
| Abnormality of globe size                     | HP:0100887 | 0.01940 | 70                      | 881                               | 8                       |
| Microphthalmos                                | HP:0000568 | 0.00957 | 62                      | 881                               | 8                       |
| Abnormality of the vasculature                | HP:0002597 | 0.01330 | 382                     | 881                               | 28                      |
| Arteriovenous malformation                    | HP:0100026 | 0.03650 | 38                      | 881                               | 5                       |
| Abnormality of the vasculature of the eye     | HP:0008047 | 0.03370 | 92                      | 881                               | 9                       |
| Pigmentary retinopathy                        | HP:0000580 | 0.00985 | 50                      | 881                               | 7                       |
| Abnormality of skin physiology                | HP:0011122 | 0.02170 | 176                     | 881                               | 15                      |
| Inflammatory abnormality of the skin          | HP:0011123 | 0.02100 | 144                     | 881                               | 13                      |

<sup>#</sup> Numbers of input genes can be identified in each database (GO and HP).

**Table S11 gProfiler functional enrichment analysis for genes carried at least one Tibetan macaque specific homozygous non-synonymous variant, which were probably or possibly damaging from the estimation of PolyPhen-2 and also ‘deleterious’ from the estimation of SIFT.**

| Term name                                                              | Category   | P-value | Total genes in category | Total genes in input <sup>#</sup> | Input genes in category |
|------------------------------------------------------------------------|------------|---------|-------------------------|-----------------------------------|-------------------------|
| G-protein coupled receptor signaling pathway                           | GO:0007186 | 0.03320 | 947                     | 348                               | 32                      |
| detection of stimulus                                                  | GO:0051606 | 0.00000 | 448                     | 348                               | 27                      |
| detection of chemical stimulus                                         | GO:0009593 | 0.00000 | 368                     | 348                               | 25                      |
| neurological system process                                            | GO:0050877 | 0.01410 | 986                     | 348                               | 34                      |
| sensory perception                                                     | GO:0007600 | 0.00000 | 604                     | 348                               | 34                      |
| sensory perception of chemical stimulus                                | GO:0007606 | 0.00000 | 397                     | 348                               | 26                      |
| sensory perception of smell                                            | GO:0007608 | 0.00001 | 350                     | 348                               | 23                      |
| detection of stimulus involved in sensory perception                   | GO:0050906 | 0.00001 | 380                     | 348                               | 24                      |
| detection of chemical stimulus involved in sensory perception          | GO:0050907 | 0.00001 | 346                     | 348                               | 23                      |
| detection of chemical stimulus involved in sensory perception of smell | GO:0050911 | 0.00001 | 334                     | 348                               | 22                      |
| visual perception                                                      | GO:0007601 | 0.03590 | 71                      | 348                               | 7                       |
| receptor activity                                                      | GO:0004872 | 0.02720 | 1368                    | 348                               | 42                      |
| signaling receptor activity                                            | GO:0038023 | 0.00815 | 1000                    | 348                               | 35                      |
| transmembrane signaling receptor activity                              | GO:0004888 | 0.00303 | 913                     | 348                               | 34                      |
| G-protein coupled receptor activity                                    | GO:0004930 | 0.00826 | 606                     | 348                               | 25                      |
| olfactory receptor activity                                            | GO:0004984 | 0.00001 | 334                     | 348                               | 22                      |
| Aplasia/Hypoplasia of the cerebrum                                     | HP:0007364 | 0.05000 | 480                     | 345                               | 16                      |
| Abnormality of globe size                                              | HP:0100887 | 0.01550 | 86                      | 345                               | 6                       |
| Microphthalmos                                                         | HP:0000568 | 0.00842 | 76                      | 345                               | 6                       |
| Abnormal cortical gyration                                             | HP:0002536 | 0.03520 | 74                      | 345                               | 5                       |

<sup>#</sup> Numbers of input genes can be identified in each database (GO and HP).

**Table S12 Numbers of transcripts contain loss-of-function variants in Tibetan macaque.** We examined the following categories: lose start codon, lose stop codon, and gain stop codon (premature stop codon). All of the examinations are based on the annotation of reference genome, and excluding the transcripts contain loss-of function variants in the reference genome. Tibetan macaque specific means these transcripts only contain loss-of-function variants in Tibetan macaque, whereas there are none loss-of-function variants in all the rest macaques (including reference).

| Failed Category  | Tibetan Macaque  |              | Tibetan Macaque specific |              |
|------------------|------------------|--------------|--------------------------|--------------|
|                  | Homozygous       | Heterozygous | Homozygous               | Heterozygous |
| Lose start codon | 89 <sup>*</sup>  | 14           | 49 <sup>#</sup>          | 8            |
| Lose stop codon  | 31               | 9            | 10                       | 3            |
| Gain stop codon  | 183 <sup>*</sup> | 95           | 100 <sup>#</sup>         | 57           |
| Total            | 300              | 118          | 158                      | 68           |

\* Three transcripts contain both lose start codon variant and gain stop codon variant.

# One transcript contains both lose start codon variant and gain stop codon variant.

**Table S13 Information of Tibetan macaque specific transcripts, which containing homozygous loss-of-function variants.** We examined the following categories: lose start codon, lose stop codon, and gain stop codon (premature stop codon). All of the examinations are based on the annotation of reference genome, and excluding the transcripts contain loss-of function variants in the reference genome. Tibetan macaque specific means these transcripts only contain loss-of-function variants in Tibetan macaque, whereas there are none loss-of-function variants in all the rest macaques (including reference). “1” is loss-of-function variant, “0” is normal. GO terms are the six GO terms we scanned in the main text.

| Transcripts    | Lose start codon | Lose stop codon | Gain stop codon | Gene symbol  | GO terms        |
|----------------|------------------|-----------------|-----------------|--------------|-----------------|
| XM_001106842.2 | 1                | 0               | 0               | ADAMDEC1     | Immune response |
| XM_001098401.1 | 1                | 0               | 0               | ARCN1        | None            |
| XM_001098236.2 | 1                | 0               | 0               | ASAH1        | None            |
| XM_001087415.2 | 0                | 0               | 1               | ATP13A2      | None            |
| XM_001105143.2 | 0                | 0               | 1               | ATP5J        | None            |
| XM_002803160.1 | 0                | 0               | 1               | ATP5J        | None            |
| XM_001095529.2 | 0                | 0               | 1               | BCAS4        | None            |
| XM_001111612.2 | 1                | 0               | 0               | BNC1         | None            |
| XM_001083792.2 | 0                | 0               | 1               | C11H12orf72  | None            |
| XM_001084019.2 | 0                | 0               | 1               | C11H12orf72  | None            |
| XM_001110274.2 | 1                | 0               | 0               | C5AR1        | Immune response |
| XM_001116077.2 | 0                | 0               | 1               | CACNG6       | None            |
| XM_001092440.2 | 0                | 0               | 1               | CLYBL        | None            |
| XM_001093299.2 | 0                | 0               | 1               | CYP1A1       | None            |
| XM_001097922.2 | 0                | 0               | 1               | FLNB         | None            |
| XM_001103527.2 | 0                | 0               | 1               | GPR116       | None            |
| XM_001089205.2 | 0                | 0               | 1               | GPR124       | None            |
| XM_001110531.2 | 1                | 0               | 0               | HSD11B1      | None            |
| XM_001096630.2 | 1                | 0               | 0               | IFITM1       | Immune response |
| XM_001084639.2 | 0                | 0               | 1               | LECT1        | None            |
| XM_002804572.1 | 1                | 0               | 0               | LOC100423271 | None            |
| XM_002802688.1 | 0                | 0               | 1               | LOC100423442 | None            |
| XM_002804499.1 | 0                | 0               | 1               | LOC100423633 | None            |
| XM_002800116.1 | 0                | 0               | 1               | LOC100423856 | None            |
| XM_002803928.1 | 0                | 0               | 1               | LOC100423945 | None            |
| XM_002798118.1 | 0                | 0               | 1               | LOC100424089 | None            |
| XM_002802573.1 | 0                | 0               | 1               | LOC100424182 | None            |
| XM_002803741.1 | 0                | 1               | 0               | LOC100424317 | None            |
| XM_002798052.1 | 0                | 0               | 1               | LOC100424641 | None            |
| XM_002799261.1 | 0                | 0               | 1               | LOC100424682 | None            |
| XM_002800992.1 | 0                | 1               | 0               | LOC100425114 | None            |
| XM_002800691.1 | 0                | 1               | 0               | LOC100425402 | None            |

|                |   |   |   |              |      |
|----------------|---|---|---|--------------|------|
| XM_002804059.1 | 1 | 0 | 0 | LOC100425512 | None |
| XM_002803769.1 | 0 | 0 | 1 | LOC100425582 | None |
| XM_002805112.1 | 1 | 0 | 0 | LOC100426007 | None |
| XM_002799795.1 | 0 | 0 | 1 | LOC100426356 | None |
| XM_002799223.1 | 0 | 0 | 1 | LOC100426488 | None |
| XM_002800121.1 | 1 | 0 | 0 | LOC100426559 | None |
| XM_002805767.1 | 0 | 0 | 1 | LOC100426789 | None |
| XM_002801560.1 | 0 | 0 | 1 | LOC100426914 | None |
| XM_002799798.1 | 0 | 0 | 1 | LOC100427074 | None |
| XM_002800058.1 | 0 | 0 | 1 | LOC100427457 | None |
| XM_002798577.1 | 0 | 0 | 1 | LOC100427895 | None |
| XM_002802943.1 | 0 | 0 | 1 | LOC100427922 | None |
| XM_002804155.1 | 0 | 0 | 1 | LOC100428052 | None |
| XM_002804951.1 | 0 | 0 | 1 | LOC100428104 | None |
| XM_002805720.1 | 1 | 0 | 0 | LOC100428135 | None |
| XM_002805632.1 | 1 | 0 | 0 | LOC100428212 | None |
| XM_002800243.1 | 1 | 0 | 0 | LOC100428281 | None |
| XM_002802208.1 | 0 | 0 | 1 | LOC100428293 | None |
| XM_002803708.1 | 0 | 0 | 1 | LOC100428305 | None |
| XM_002801310.1 | 0 | 0 | 1 | LOC100428395 | None |
| XM_002804691.1 | 0 | 0 | 1 | LOC100428442 | None |
| XM_002798717.1 | 0 | 0 | 1 | LOC100428676 | None |
| XM_002798509.1 | 0 | 0 | 1 | LOC100428805 | None |
| XM_002798841.1 | 0 | 0 | 1 | LOC100428808 | None |
| XM_002800348.1 | 0 | 0 | 1 | LOC100428972 | None |
| XM_002801753.1 | 1 | 0 | 0 | LOC100429230 | None |
| XM_002804971.1 | 0 | 0 | 1 | LOC100429418 | None |
| XM_002801719.1 | 0 | 0 | 1 | LOC100429545 | None |
| XM_002803845.1 | 0 | 1 | 0 | LOC100429558 | None |
| XM_002802033.1 | 1 | 0 | 0 | LOC100429613 | None |
| XM_002798976.1 | 0 | 0 | 1 | LOC100429750 | None |
| XM_002798155.1 | 1 | 0 | 0 | LOC100430211 | None |
| XM_002800940.1 | 1 | 0 | 0 | LOC100430263 | None |
| XM_002799316.1 | 1 | 0 | 0 | LOC100430329 | None |
| XM_002800808.1 | 1 | 0 | 0 | LOC100430372 | None |
| XM_002800179.1 | 1 | 0 | 0 | LOC100430447 | None |
| XM_002798511.1 | 0 | 0 | 1 | LOC100430610 | None |
| XM_002804571.1 | 0 | 0 | 1 | LOC100430648 | None |
| XM_002804529.1 | 1 | 0 | 0 | LOC100430673 | None |
| XM_002804191.1 | 0 | 0 | 1 | LOC100430934 | None |
| XM_002803377.1 | 0 | 1 | 0 | LOC100430997 | None |
| XM_001082317.2 | 1 | 0 | 0 | LOC693603    | None |
| XM_001082159.2 | 0 | 0 | 1 | LOC693699    | None |

|                |   |   |   |           |      |
|----------------|---|---|---|-----------|------|
| XM_001082718.2 | 1 | 0 | 0 | LOC694009 | None |
| XM_001082966.2 | 1 | 0 | 0 | LOC694262 | None |
| XM_001083089.2 | 0 | 0 | 1 | LOC694395 | None |
| XM_001083320.1 | 0 | 0 | 1 | LOC694656 | None |
| XM_001088636.2 | 0 | 0 | 1 | LOC695115 | None |
| XM_001083764.2 | 0 | 0 | 1 | LOC695131 | None |
| XM_001084343.1 | 0 | 0 | 1 | LOC695700 | None |
| XM_001086742.2 | 0 | 0 | 1 | LOC695873 | None |
| XM_001088982.2 | 1 | 0 | 0 | LOC696151 | None |
| XM_001086586.2 | 1 | 0 | 0 | LOC697070 | None |
| XM_001090938.2 | 1 | 0 | 1 | LOC698002 | None |
| XM_002799710.1 | 1 | 0 | 0 | LOC699328 | None |
| XM_001088432.2 | 0 | 0 | 1 | LOC700024 | None |
| XM_001088760.1 | 1 | 0 | 0 | LOC700405 | None |
| XM_001096561.2 | 0 | 0 | 1 | LOC701327 | None |
| XM_001089687.1 | 0 | 0 | 1 | LOC701396 | None |
| XM_001094673.2 | 0 | 0 | 1 | LOC701840 | None |
| XM_001090152.2 | 1 | 0 | 0 | LOC701870 | None |
| XM_001099612.2 | 0 | 1 | 0 | LOC702143 | None |
| XM_001090733.1 | 0 | 0 | 1 | LOC702427 | None |
| XM_001091570.2 | 0 | 0 | 1 | LOC703272 | None |
| XM_001104264.2 | 0 | 0 | 1 | LOC703645 | None |
| XM_001092960.1 | 1 | 0 | 0 | LOC704594 | None |
| XM_001093190.2 | 0 | 0 | 1 | LOC704829 | None |
| XM_001099141.2 | 0 | 0 | 1 | LOC705360 | None |
| XM_001100470.1 | 0 | 0 | 1 | LOC705678 | None |
| XM_001096487.2 | 0 | 0 | 1 | LOC708042 | None |
| XM_001104416.2 | 0 | 0 | 1 | LOC708085 | None |
| XM_001104842.2 | 0 | 0 | 1 | LOC708539 | None |
| XM_001104915.2 | 0 | 0 | 1 | LOC708539 | None |
| XM_001097383.2 | 0 | 0 | 1 | LOC708887 | None |
| XM_001109550.2 | 1 | 0 | 0 | LOC709014 | None |
| XM_001106570.2 | 0 | 1 | 0 | LOC709560 | None |
| XM_002800155.1 | 0 | 1 | 0 | LOC709560 | None |
| XM_001094140.2 | 0 | 0 | 1 | LOC709652 | None |
| XM_001098646.2 | 0 | 0 | 1 | LOC710063 | None |
| XM_001098747.2 | 0 | 0 | 1 | LOC710159 | None |
| XM_001099165.2 | 1 | 0 | 0 | LOC710528 | None |
| XM_001110734.2 | 0 | 0 | 1 | LOC711432 | None |
| XM_001110773.2 | 0 | 0 | 1 | LOC711432 | None |
| XM_001110816.2 | 0 | 0 | 1 | LOC711432 | None |
| XM_001100246.2 | 0 | 0 | 1 | LOC711444 | None |
| XM_001111484.2 | 0 | 0 | 1 | LOC711991 | None |

|                |   |   |   |           |                 |
|----------------|---|---|---|-----------|-----------------|
| XM_001111004.2 | 1 | 0 | 0 | LOC712160 | None            |
| XM_001112828.2 | 1 | 0 | 0 | LOC713986 | None            |
| XM_001104157.2 | 0 | 0 | 1 | LOC714417 | None            |
| XM_001111884.2 | 1 | 0 | 0 | LOC715124 | None            |
| XM_001105303.2 | 1 | 0 | 0 | LOC715195 | None            |
| XM_001105373.2 | 0 | 0 | 1 | LOC715243 | None            |
| XM_001116547.2 | 0 | 0 | 1 | LOC716163 | None            |
| XM_001107106.2 | 0 | 0 | 1 | LOC716398 | None            |
| XM_001107484.1 | 0 | 0 | 1 | LOC716640 | None            |
| XM_001108092.2 | 1 | 0 | 0 | LOC716986 | None            |
| XM_001110670.2 | 1 | 0 | 0 | LOC718263 | None            |
| XM_001110906.2 | 0 | 0 | 1 | LOC718353 | None            |
| XM_001111234.2 | 0 | 0 | 1 | LOC718483 | None            |
| XM_002801818.1 | 0 | 0 | 1 | LOC719152 | None            |
| XM_001113842.2 | 0 | 0 | 1 | LOC719516 | None            |
| XM_001113864.2 | 0 | 0 | 1 | LOC719519 | None            |
| XM_001114397.2 | 1 | 0 | 0 | LOC719750 | None            |
| XM_001115954.2 | 0 | 1 | 0 | LOC720477 | None            |
| XM_001116180.2 | 1 | 0 | 0 | LOC720596 | None            |
| XM_001116567.2 | 0 | 0 | 1 | LOC720768 | None            |
| XM_001118014.2 | 0 | 1 | 0 | LOC721815 | None            |
| XM_001118456.2 | 1 | 0 | 0 | LOC722292 | None            |
| XM_001085216.2 | 1 | 0 | 0 | MS4A10    | None            |
| XM_001103964.2 | 1 | 0 | 0 | PRMT5     | None            |
| XM_002804980.1 | 1 | 0 | 0 | PRMT5     | None            |
| XM_001107427.2 | 0 | 0 | 1 | RHPN2     | None            |
| XM_001110408.2 | 0 | 0 | 1 | S100A9    | Immune response |
| XM_002803380.1 | 0 | 0 | 1 | SAMD9     | None            |
| XM_001093788.2 | 1 | 0 | 0 | SFRS2IP   | None            |
| XM_001086434.1 | 0 | 0 | 1 | SKI       | None            |
| XM_001090485.2 | 0 | 0 | 1 | SLC24A3   | None            |
| XM_001090491.2 | 0 | 0 | 1 | SPINK4    | None            |
| XM_001102219.2 | 0 | 0 | 1 | SPTLC1    | None            |
| XM_002803240.1 | 0 | 0 | 1 | SRCRB4D   | None            |
| XM_001092105.1 | 0 | 0 | 1 | TAS2R60   | None            |
| XM_001096255.2 | 0 | 0 | 1 | TNFRSF13B | None            |
| XM_001118873.2 | 0 | 0 | 1 | TNFRSF8   | None            |
| XM_001083155.2 | 1 | 0 | 0 | UBE2C     | None            |
| XM_001083272.2 | 1 | 0 | 0 | UBE2C     | None            |
| XM_001108117.2 | 0 | 0 | 1 | ZNF222    | None            |

**Table S14 Information of Tibetan macaque specific transcripts, which containing heterozygous loss-of-function variants.** We examined the following categories: lose start codon, lose stop codon, and gain stop codon (premature stop codon). All of the examinations are based on the annotation of reference genome, and excluding the transcripts contain loss-of function variants in the reference genome. Tibetan macaque specific means these transcripts only contain loss-of-function variants in Tibetan macaque, whereas there are none loss-of-function variants in all the rest macaques (including reference). “1” is loss-of-function variant, “0” is normal. GO terms are the six GO terms we scanned in the main text.

| Transcripts    | Lose start codon | Lose stop codon | Gain stop codon | Gene symbol  | GO terms        |
|----------------|------------------|-----------------|-----------------|--------------|-----------------|
| XM_001101072.1 | 0                | 0               | 1               | ANXA13       | None            |
| XM_001101163.2 | 0                | 0               | 1               | ANXA13       | None            |
| XM_001081983.2 | 0                | 0               | 1               | C13H2orf79   | None            |
| XM_001107677.2 | 0                | 0               | 1               | CAPZA1       | Immune response |
| XM_001097284.2 | 0                | 0               | 1               | CST2         | None            |
| XM_001105622.2 | 0                | 0               | 1               | DUSP11       | None            |
| XM_001094642.2 | 0                | 1               | 0               | FHIT         | None            |
| XM_001099955.2 | 0                | 0               | 1               | HNRPH1       | None            |
| XM_001089749.2 | 0                | 0               | 1               | KCNE2        | None            |
| XM_001099641.2 | 0                | 0               | 1               | KRTAP15-1    | None            |
| XM_002803609.1 | 0                | 0               | 1               | LOC100423209 | None            |
| XM_002805610.1 | 0                | 0               | 1               | LOC100423320 | None            |
| XM_002803267.1 | 0                | 0               | 1               | LOC100423547 | None            |
| XM_002800813.1 | 0                | 0               | 1               | LOC100423926 | None            |
| XM_002803507.1 | 1                | 0               | 0               | LOC100424055 | None            |
| XM_002804006.1 | 0                | 0               | 1               | LOC100424970 | None            |
| XM_002804503.1 | 0                | 0               | 1               | LOC100425139 | None            |
| XM_002800650.1 | 0                | 0               | 1               | LOC100425805 | None            |
| XM_002805551.1 | 0                | 0               | 1               | LOC100426145 | None            |
| XM_002801806.1 | 1                | 0               | 0               | LOC100426716 | None            |
| XM_002802220.1 | 0                | 0               | 1               | LOC100426943 | None            |
| XM_002799112.1 | 0                | 0               | 1               | LOC100426954 | None            |
| XM_002802716.1 | 0                | 0               | 1               | LOC100427061 | None            |
| XM_002798655.1 | 0                | 0               | 1               | LOC100427518 | None            |
| XM_002800346.1 | 0                | 0               | 1               | LOC100428062 | None            |
| XM_002803312.1 | 0                | 0               | 1               | LOC100428263 | None            |
| XM_002802253.1 | 0                | 0               | 1               | LOC100429165 | None            |
| XM_002800923.1 | 1                | 0               | 0               | LOC100430041 | None            |
| XM_002798953.1 | 0                | 0               | 1               | LOC100430325 | None            |
| XM_001082844.2 | 0                | 0               | 1               | LOC694141    | None            |
| XM_001083923.2 | 0                | 1               | 0               | LOC694712    | None            |
| XM_001084233.2 | 0                | 0               | 1               | LOC695597    | None            |



|                |   |   |   |           |      |
|----------------|---|---|---|-----------|------|
| XM_001086104.2 | 0 | 0 | 1 | LOC697534 | None |
| XM_001088444.2 | 0 | 0 | 1 | LOC700038 | None |
| XM_001090940.2 | 0 | 0 | 1 | LOC700257 | None |
| XM_002805571.1 | 0 | 0 | 1 | LOC700257 | None |
| XM_001099502.2 | 0 | 0 | 1 | LOC701418 | None |
| XM_001099697.2 | 0 | 0 | 1 | LOC701418 | None |
| XM_001089802.2 | 1 | 0 | 0 | LOC701506 | None |
| XM_001090262.2 | 0 | 0 | 1 | LOC701982 | None |
| XM_001090390.2 | 0 | 0 | 1 | LOC702107 | None |
| XM_001091566.2 | 0 | 0 | 1 | LOC703267 | None |
| XM_001093514.2 | 0 | 0 | 1 | LOC705133 | None |
| XM_001097061.1 | 1 | 0 | 0 | LOC708585 | None |
| XM_001097172.2 | 0 | 0 | 1 | LOC708687 | None |
| XM_001106627.2 | 0 | 0 | 1 | LOC708726 | None |
| XM_001104102.2 | 0 | 1 | 0 | LOC709203 | None |
| XM_001097871.2 | 0 | 0 | 1 | LOC709347 | None |
| XM_001108568.2 | 0 | 0 | 1 | LOC710595 | None |
| XM_001104811.2 | 0 | 0 | 1 | LOC712404 | None |
| XM_001101814.2 | 0 | 0 | 1 | LOC712728 | None |
| XM_002799392.1 | 0 | 0 | 1 | LOC712728 | None |
| XM_002799393.1 | 0 | 0 | 1 | LOC712728 | None |
| XM_001102637.2 | 1 | 0 | 0 | LOC713322 | None |
| XM_001102724.2 | 0 | 0 | 1 | LOC713381 | None |
| XM_001105162.2 | 0 | 0 | 1 | LOC715088 | None |
| XM_001105243.2 | 0 | 0 | 1 | LOC715160 | None |
| XM_001107850.2 | 0 | 0 | 1 | LOC716859 | None |
| XM_001110595.2 | 0 | 0 | 1 | LOC718221 | None |
| XM_001114435.2 | 1 | 0 | 0 | LOC719766 | None |
| XM_001118627.2 | 0 | 0 | 1 | LOC722485 | None |
| XM_002805543.1 | 0 | 0 | 1 | LOC722485 | None |
| XM_001099855.2 | 0 | 0 | 1 | NR3C2     | None |
| XM_001111014.2 | 0 | 0 | 1 | RNF11     | None |
| XM_001090497.2 | 0 | 0 | 1 | SAMD9     | None |
| XM_001106157.2 | 1 | 0 | 0 | SLC44A4   | None |
| XM_001092064.2 | 0 | 0 | 1 | SYCP3     | None |
| XM_001091775.2 | 0 | 0 | 1 | SYNJ2BP   | None |

---
